# Supplementary material for: Coffee Drinking and Risk of Lung Cancer—A Meta-Analysis
Source: Oxford University Press journal article supplement (doi:10.1158/1055-9965.epi-15-0727), 2016-03-28
Supplement: 10559965epi150727-sup-152155_1_supp_3330226_w1w4ww.docx [file 10559965epi150727-sup-152155_1_supp_3330226_w1w4ww.docx]

**Supplemental Information:**

**Supplemental Table 1. Characteristics of the studies included in the meta-analysis**

| **Characteristics** | **No. of Risk Estimates** | **References** |
| --- | --- | --- |
| **Study Design** |  |  |
| Prospective Cohort studies | 6 | [11, 14, 17, 18, 22, 25, 27, 28] |
| Population-Based Case- Controls | 4 | [10, 16, 19, 23, 29] |
| Hospital-Based Case- Controls | 8 | [[2](#_ENREF_2), [12](#_ENREF_12), 13, [1](#_ENREF_14)5, [20](#_ENREF_19), [2](#_ENREF_20)1, [2](#_ENREF_23)4, [2](#_ENREF_25)6] |
| **Sex** |  |  |
| Both M/F combined | 5 | [[1](#_ENREF_11)2, 1[7](#_ENREF_16), [1](#_ENREF_18)9, [2](#_ENREF_20)1, [2](#_ENREF_22)3, 27-29] |
| Females only | 6 | [[2](#_ENREF_2), [1](#_ENREF_12)3, [1](#_ENREF_15)6, [1](#_ENREF_17)8, [2](#_ENREF_24)5, [2](#_ENREF_25)6] |
| Males only | 12 | [[2](#_ENREF_2), [10](#_ENREF_9), [1](#_ENREF_10)1, [1](#_ENREF_13)4, [1](#_ENREF_14)5, [1](#_ENREF_16)7, [1](#_ENREF_17)8, 20, [2](#_ENREF_21)2, [24-2](#_ENREF_23)6] |
| **Region** |  |  |
| Asia | 8 | [[1](#_ENREF_10)1, [1](#_ENREF_12)3, [1](#_ENREF_14)5, [1](#_ENREF_17)8, [1](#_ENREF_18)9, [2](#_ENREF_21)2, [2](#_ENREF_23)4, [2](#_ENREF_25)6] |
| Europe | 5 | [[2](#_ENREF_2), [10](#_ENREF_9), [1](#_ENREF_16)7, [2](#_ENREF_22)3, [2](#_ENREF_24)5, 29] |
| North America | 4 | [[12](#_ENREF_11), [1](#_ENREF_13)4, [1](#_ENREF_15)6, [2](#_ENREF_20)1, 27, 28] |
| South America | 1 | [20] |
| **Smoking Status** |  |  |
| All combined | 14 | [[2](#_ENREF_2), [10](#_ENREF_9), [12-1](#_ENREF_11)5, [17-1](#_ENREF_16)9, [2](#_ENREF_20)1, [2](#_ENREF_21)2, [24-2](#_ENREF_23)6] |
| Non-smokers | 3 | [[2](#_ENREF_2), [1](#_ENREF_15)6, [2](#_ENREF_22)3, 27] |
| Smokers | 3 | [[2](#_ENREF_2), [1](#_ENREF_10)1, 20] |
| **Histologies** |  |  |
| All histological subtypes | 17 | [[2](#_ENREF_2), [10-2](#_ENREF_9)5] |
| Adenocarcinomas | 2 | [[2](#_ENREF_2), 26, 27] |
| Squamous/Small cell | 3 | [[2](#_ENREF_2), 20, [2](#_ENREF_25)6, 27] |

**Supplemental Table 2. Pooled analysis using random effects model for ever vs. never coffee drinking, stratified by study design.**

| **Smoking Status** | **Design** | **No. Studies** | **RR** | **95% CI** | **Heterog. *p* - value** |
| --- | --- | --- | --- | --- | --- |
| All* | HCC | 8 | 1.08 | 0.86 - 1.30 | < .001 |
| All* | PCC | 5 | 0.97 | 0.68 - 1.27 | 0.10 |
| All* | Prospective Cohort | 9 | 1.18 | 1.05 - 1.31 | < .001 |
| Smoking Adjusted° | HCC | 7 | 0.97 | 0.82 - 1.11 | 0.02 |
| Smoking Adjusted° | PCC | 4 | 0.91 | 0.70 - 1.12 | 0.40 |
| Smoking Adjusted° | Prospective Cohort | 5 | 1.14 | 1.01 - 1.28 | <.001 |
| All* = None, ex, & current smokers | |  |  |  |  |
| °Smoking Adjusted = Non-smokers studies and studies that adjusted for smoking | | | | | |

**Supplemental Table 3. Pooled analysis using random effects model for ever vs. never coffee drinking, stratified by region.**

| **Smoking Status** | **Region** | **No. Studies** | **RR** | **95% CI** | **Heterog. *p* - value** |
| --- | --- | --- | --- | --- | --- |
| All* | Asia | 8 | 1.23 | 0.88 - 1.58 | < .001 |
| All* | Europe | 7 | 1.13 | 0.82 - 1.43 | <.001 |
| All* | Americas^ | 7 | 1.12 | 1.02 - 1.22 | <.001 |
| Smoking Adjusted° | Asia | 4 | 0.85 | 0.67 - 1.03 | 0.16 |
| Smoking Adjusted° | Europe | 5 | 1.02 | 0.69 - 1.36 | 0.02 |
| Smoking Adjusted° | Americas^ | 7 | 1.12 | 1.02 - 1.22 | <.001 |
| All* = None, ex, & current smokers | |  |  |  |  |
| Smoking Adjusted° = Non-smokers studies and studies that adjusted for smoking | | | | | |
| Americas^ = Studies from North & South America | | |  |  |  |

**Supplementary Materials and Methods**

**Systematic Search Terms**

**Search Terms PubMed**

Pulmonary Neoplasms OR Pulmonary Neoplasm OR Lung Neoplasm OR Lung Neoplasms OR Lung cancer OR Lung cancers OR pulmonary cancer OR Pulmonary Cancers OR "Lung Neoplasms"[Mesh] Pulmonary tumor OR lung tumors OR lung tumor OR pulmonary tumors AND ("Coffee"[Mesh]) OR Coffee

**Search Terms EMBASE**

Cancer, cancers, coffee, lung, lung cancer, lung cancers, lung neoplasm, lung neoplasms, lung tumor, lung tumors, neoplasm, neoplasms, pulmonary, pulmonary cancer, pulmonary cancers, pulmonary neoplasm, pulmonary neoplasms, pulmonary tumor, pulmonary tumors, tumor, tumors

**Total Search yielded** **182** articles between PubMed and EMBASE

**Search Terms PubMed**

("Diet"[Mesh]) AND (Pulmonary Neoplasms) OR Pulmonary Neoplasm) OR Lung Neoplasm) OR Lung Neoplasms) OR Lung cancer) OR Lung cancers) OR pulmonary cancer) OR Pulmonary Cancers) OR "Lung Neoplasms"[Mesh]))) NOT (("Coffee"[Mesh]) OR Coffee)

**Total Search yielded 1101** articles were found but none of these had relevant data, on coffee and lung cancer, to be extracted.

**Search Terms PubMed**

Pulmonary Neoplasms) OR Pulmonary Neoplasm) OR Lung Neoplasm) OR Lung Neoplasms)

OR Lung cancer) OR Lung cancers) OR pulmonary cancer) OR Pulmonary Cancers) OR "Lung Neoplasms"[Mesh])) AND Food Habits) NOT (("Coffee"[Mesh]) OR Coffee)

**Total Search yielded 210** articles were found but none of these had relevant data, on coffee and lung cancer, to be extracted.

**Total 8** from Tang et. al’s citations [4].

**Supplemental Figure 1. Pooled analysis forest plot adjusting for smoking, stratified by gender**

**Men
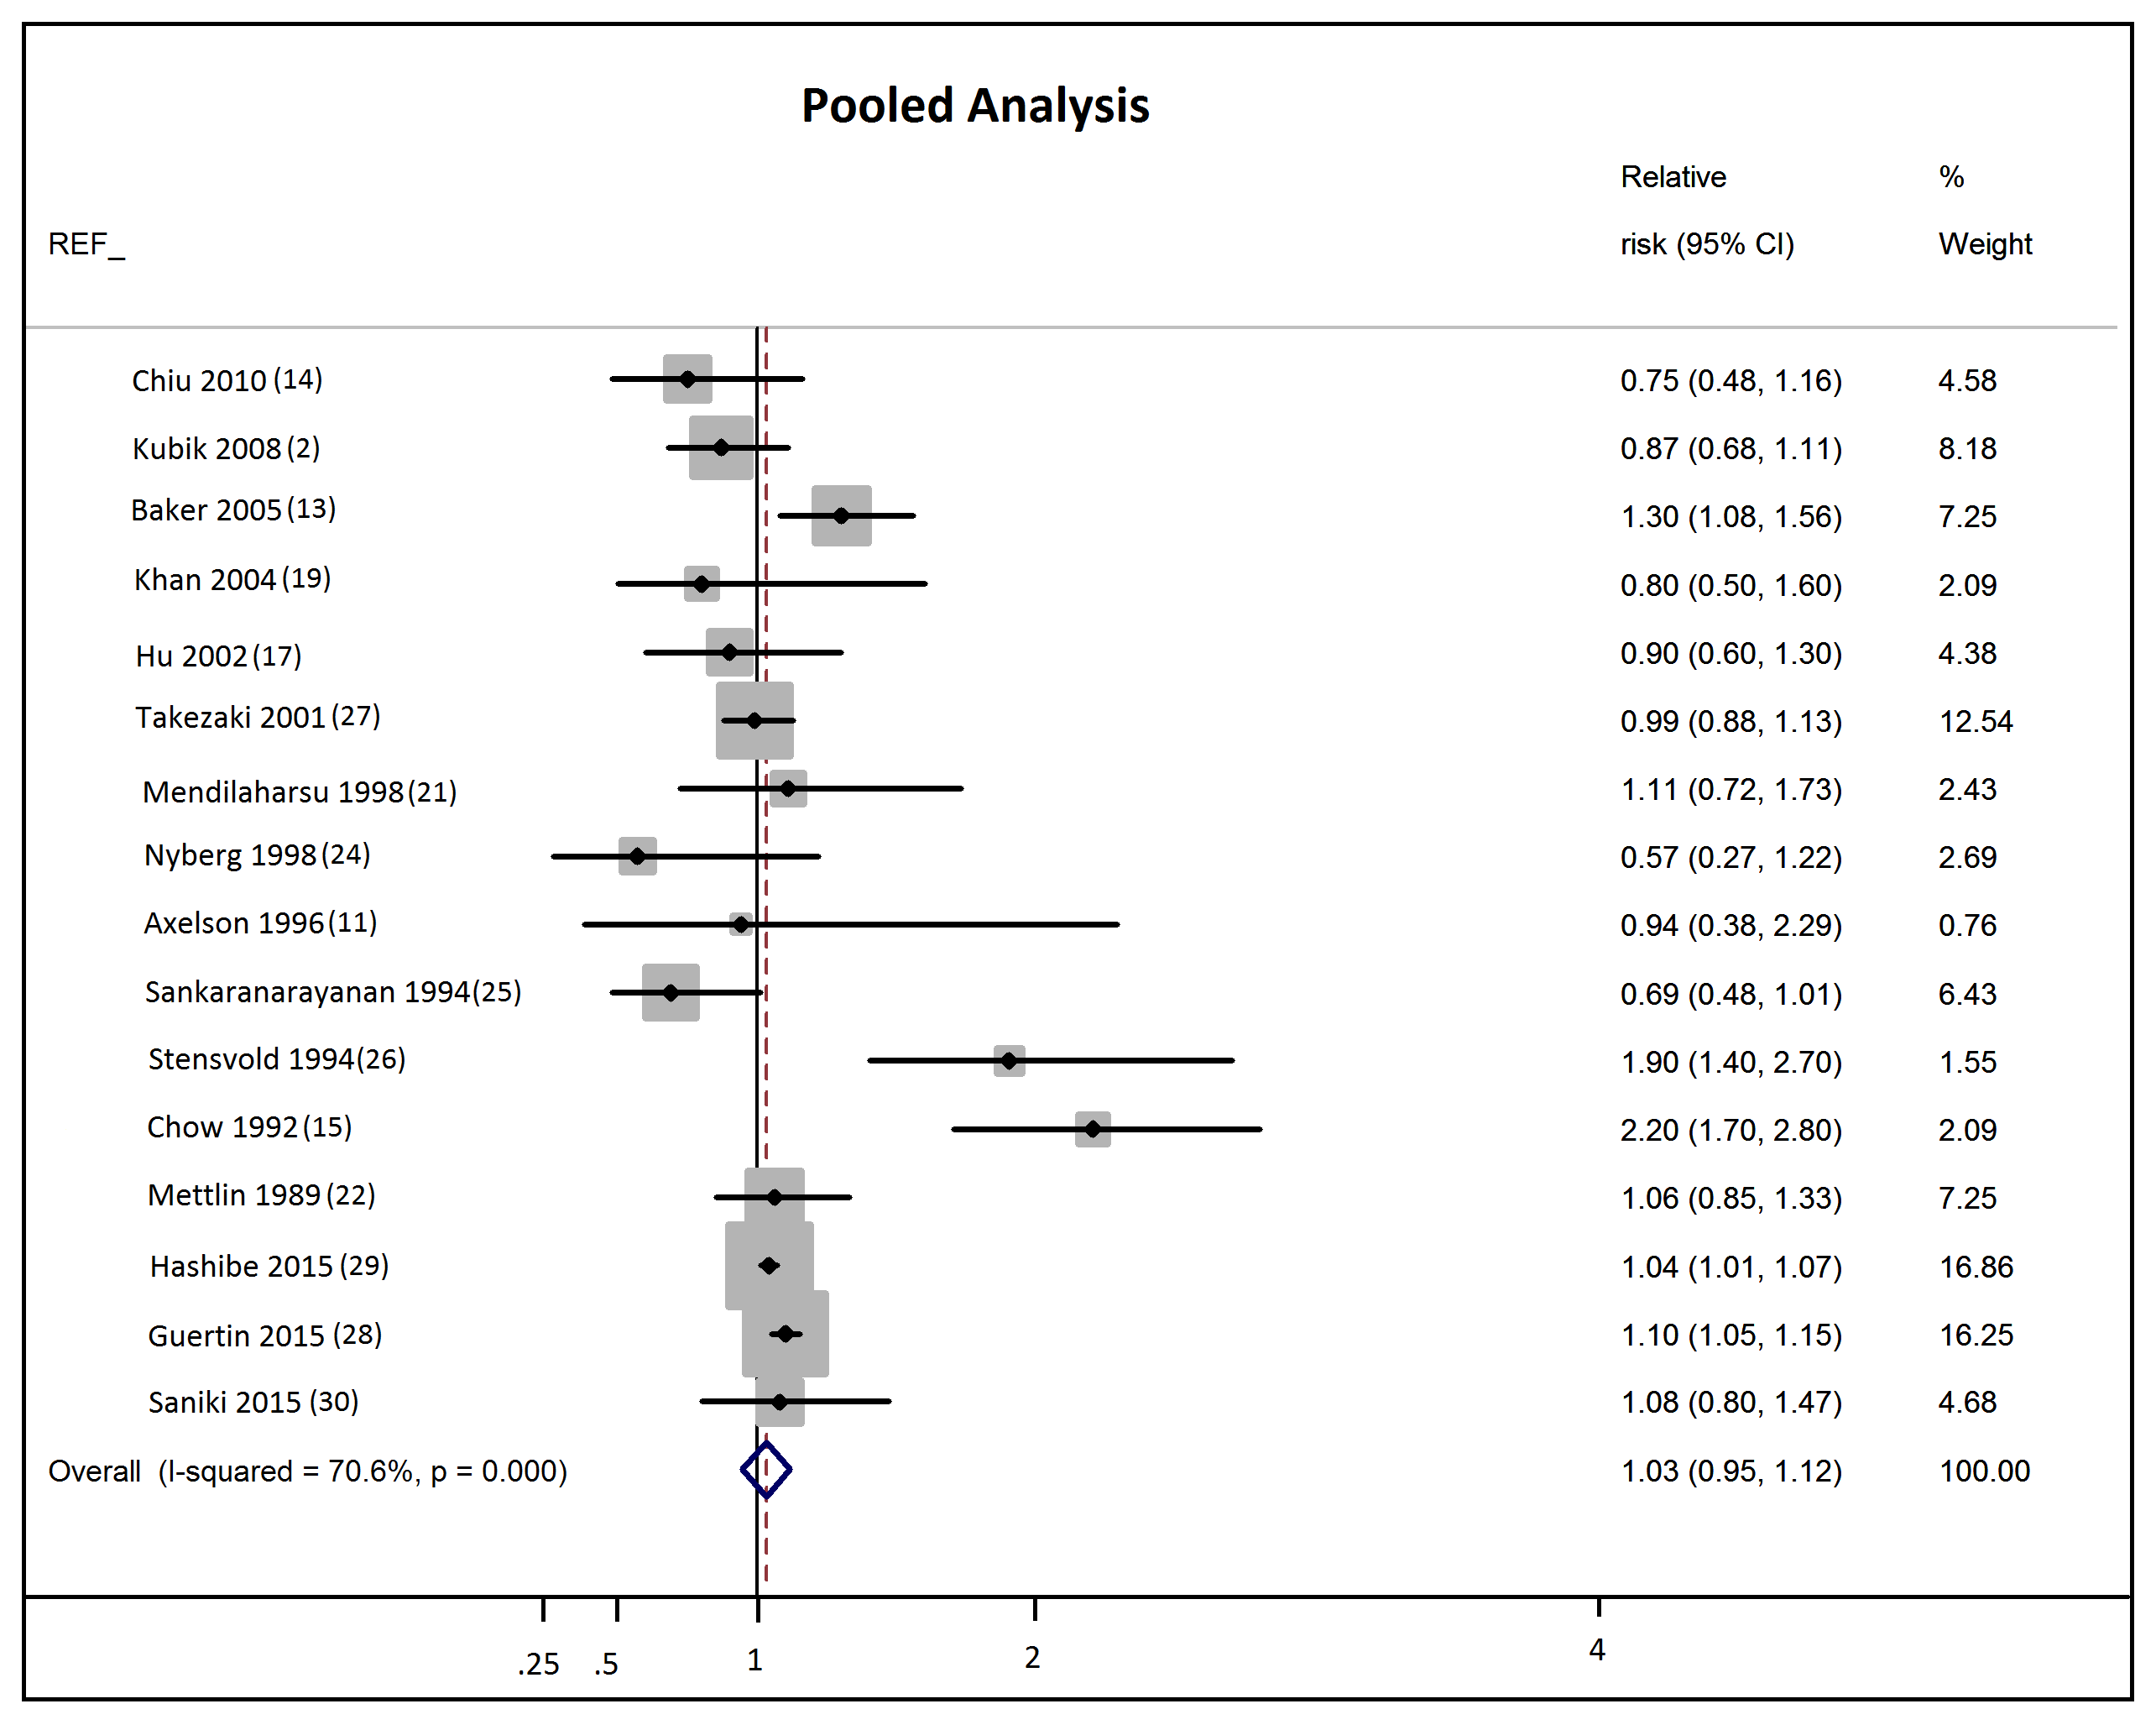
**

**Supplemental Figure 2. Forest plot for all non-smokers, stratified by gender**

**
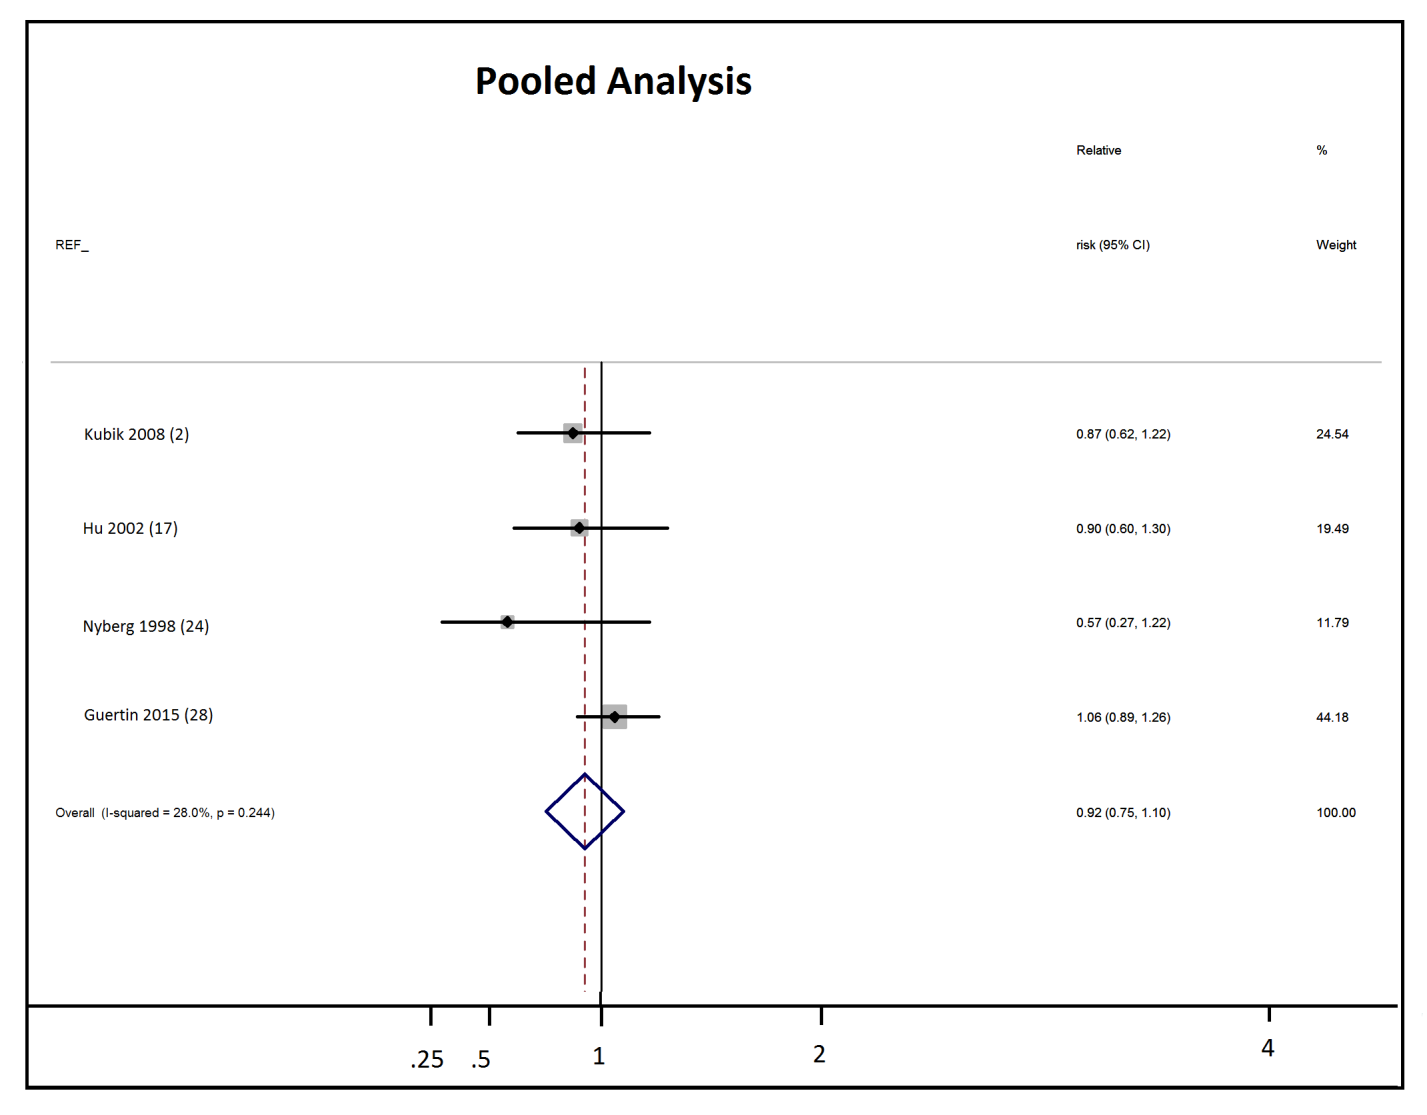
**

**Supplemental Figure 3. Funnel Plot**

**
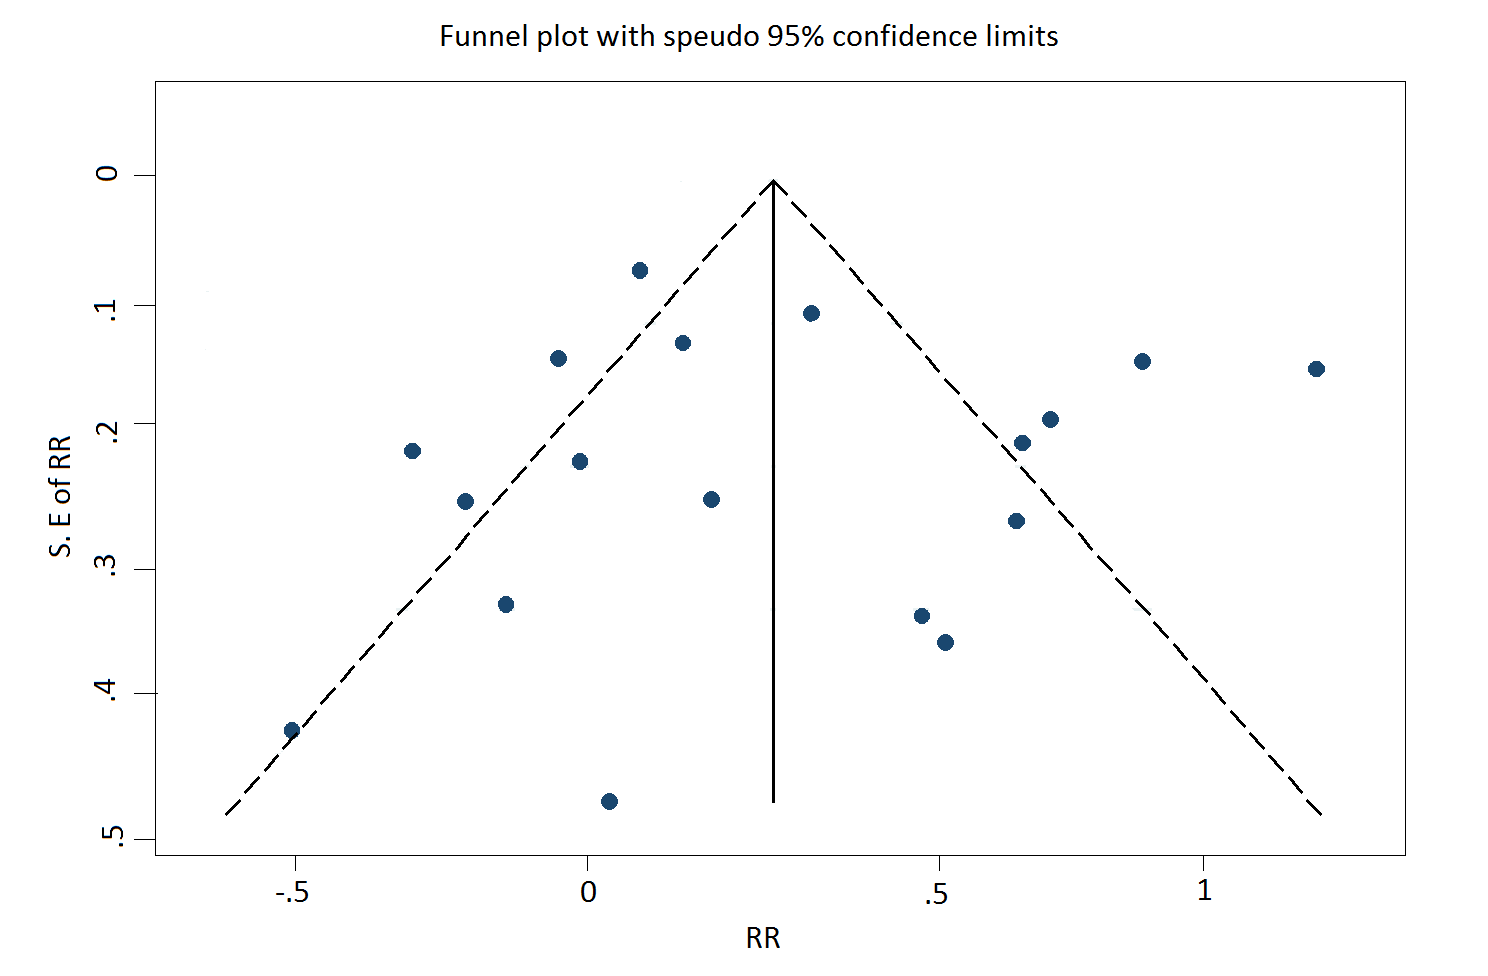
**
